# Supplementary material for: Butyrate inhibits iILC2-mediated lung inflammation via lung-gut axis in chronic obstructive pulmonary disease (COPD)
Source: Springer Nature journal article supplement (doi:10.1186/s12890-023-02438-z), 2023-05-12
Supplement: MOESM1 [file 25352766]

2 20 200 2 20 200 2 20 200

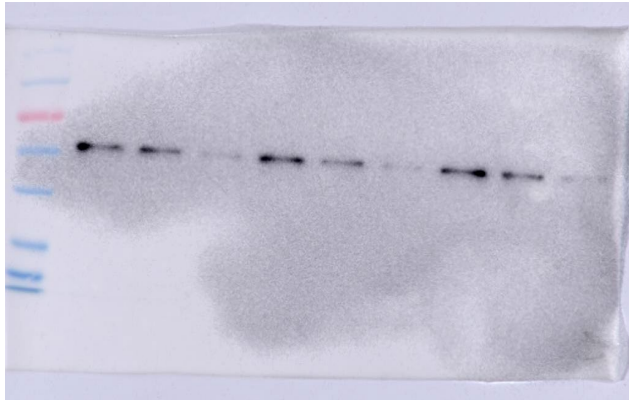

IL-17RB

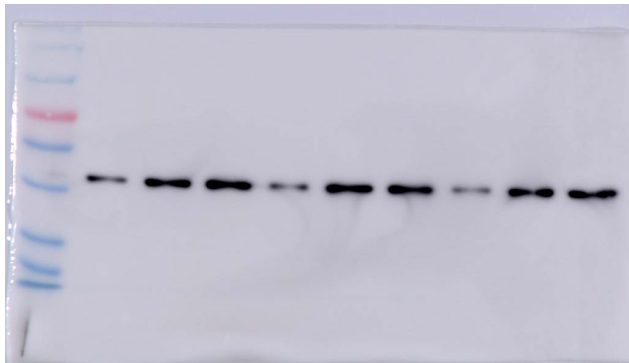

Arg1

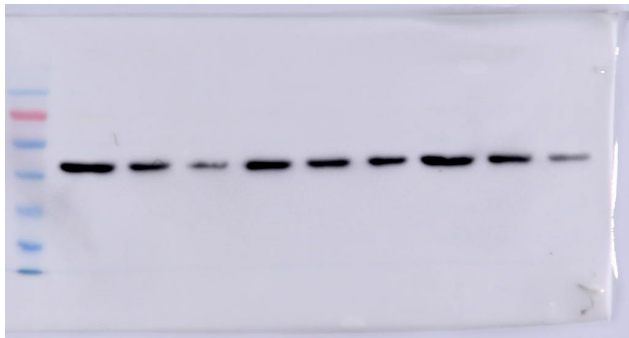

KLRG1

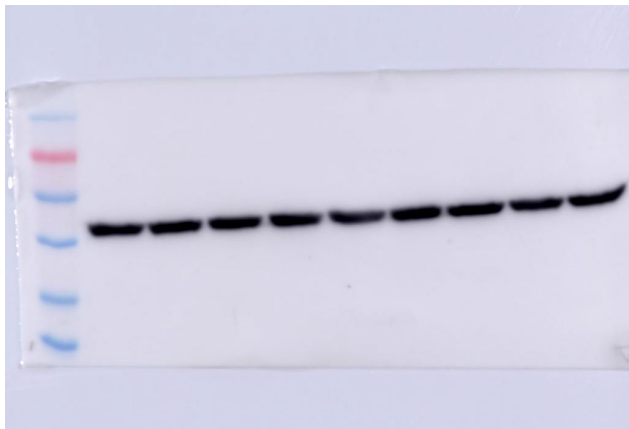

$\beta$ -Actin
